# Supplementary material for: Translocation and deletion breakpoints in cancer genomes are associated with potential non-B DNA-forming sequences
Source: PubMed Central journal article supplement — Nucleic Acids Res. 2016 Apr 15;44(12):5673–88. doi: 10.1093/nar/gkw261 (PMC4937311; doi:10.1093/nar/gkw261), 2016-04-15
Supplement: supp_gkw261_nar-00015-d-2016-File007.pdf [file supp_gkw261_nar-00015-d-2016-File007.pdf]

**Translocation and Deletion Breakpoints in Cancer Genomes Are Associated with  
Potential Non-B DNA-Forming Sequences**

Albino Bacolla, John A. Tainer, Karen M. Vasquez, and David N. Cooper

**Supplementary Information**

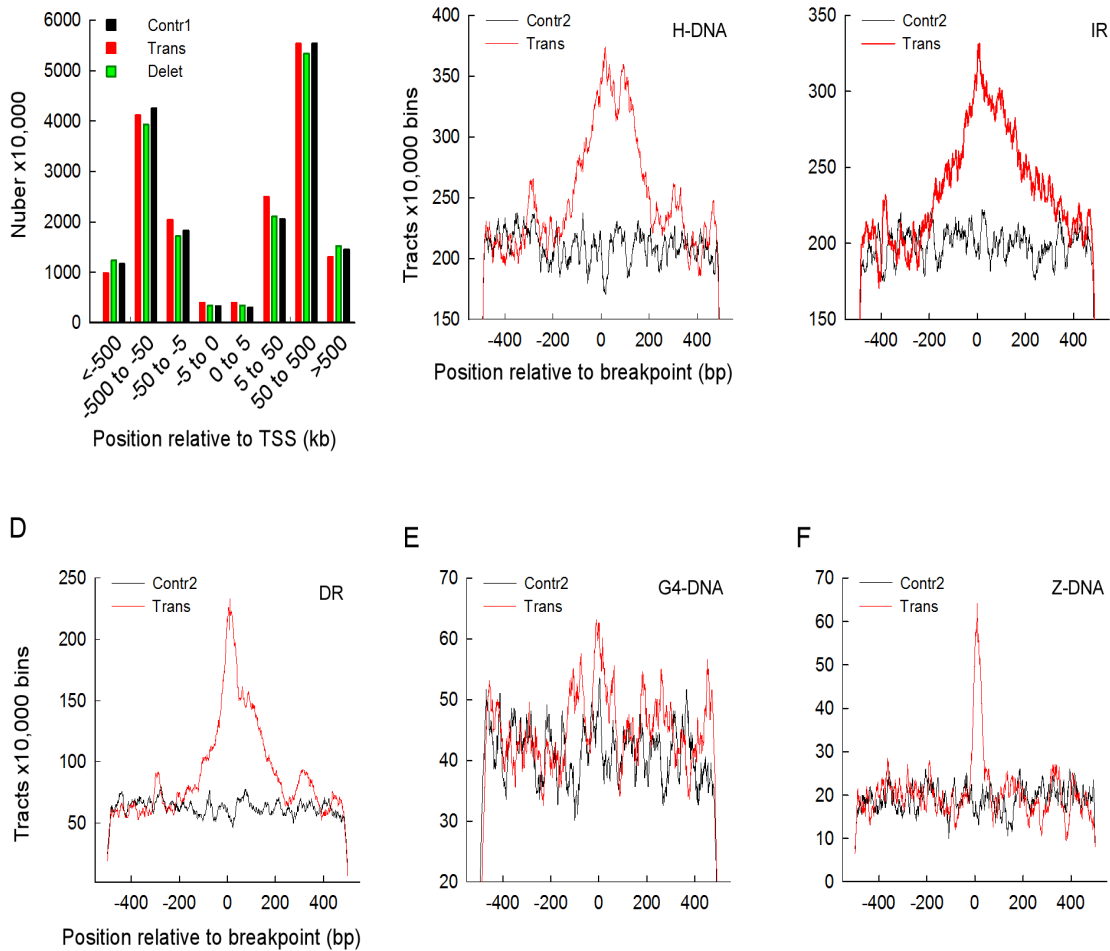

**Supplementary Figure 1.** Translocation sequence-dependent context does not account for the colocalization of non-B DNA-forming motifs at translocation breakpoints. **(A)** Distribution of breakpoints (number x 10,000 instances) with respect to transcription start sites (TSS) genome-wide for translocations (*red*), deletions (*green*) and Contr1 (*black*). **(B)** Number of DNA triplex-forming repeats (*H-DNA*) for 10,000 bins found near translocation (*red*), and Contr2 (*black*) breakpoints. **(C)** Same as in B, but for cruciform-forming inverted repeats (*IR*). **(D)** Same as in B, but for loop DNA-forming tandem repeats (*DR*). **(E)** Same as in B, but for quadruplex-forming repeats (*G4-DNA*). **(F)** Same as in B, but for left-handed DNA-forming repeats (*Z-DNA*). Numbers refer to the counts of bases belonging to each repeat type at every position; for H-DNA and IR, any bases separating a pair of repeats were excluded from the count.

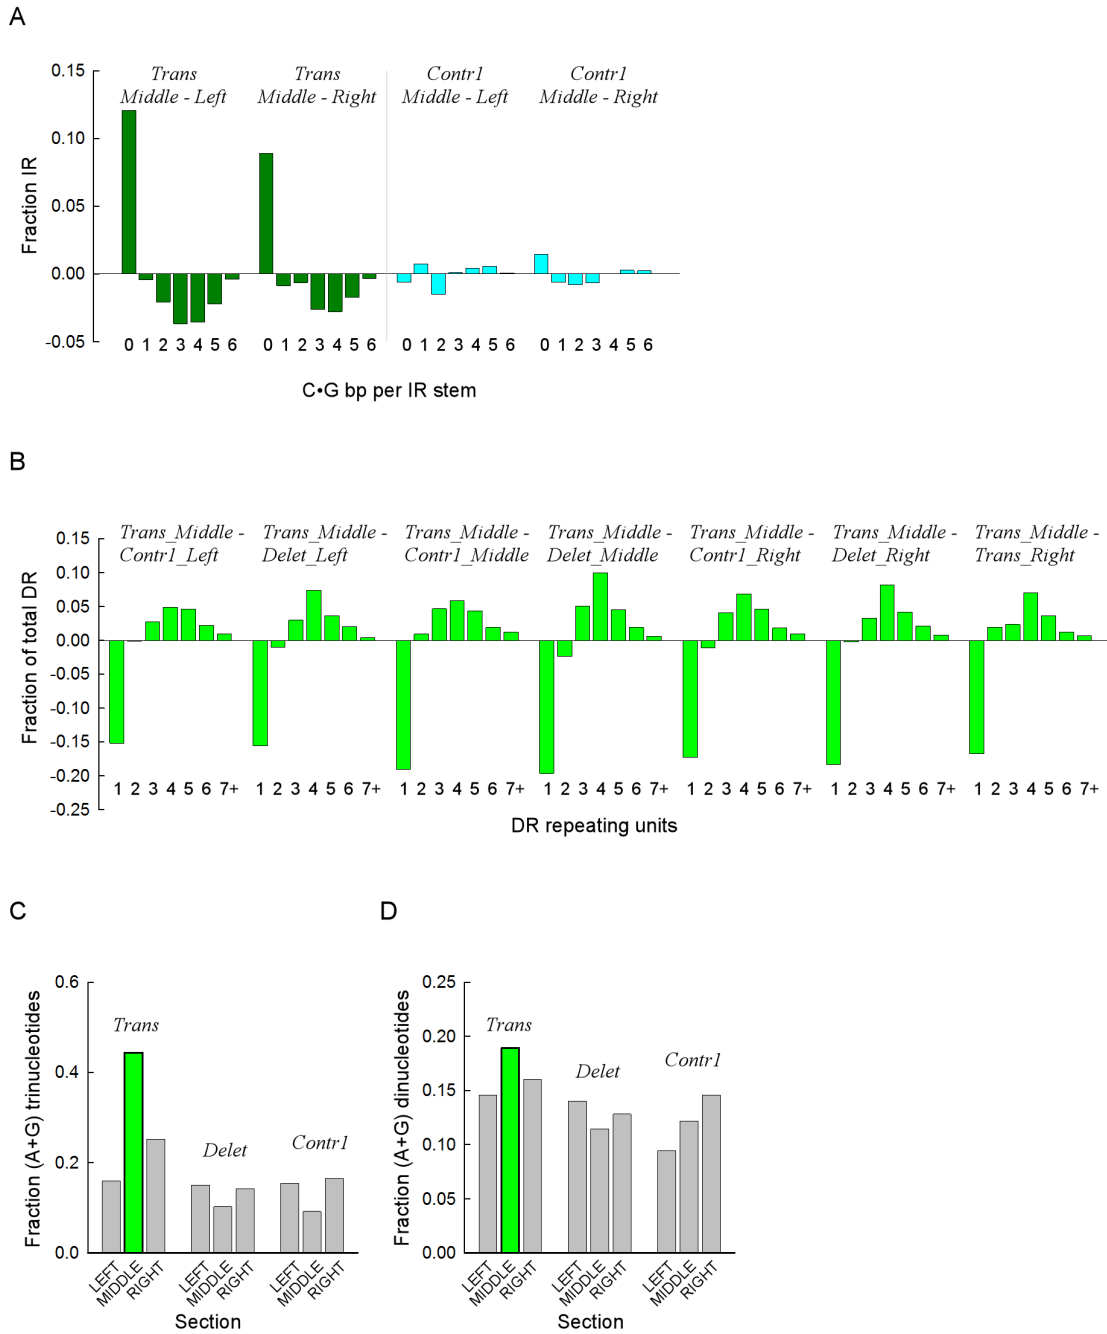

**Supplementary Figure 2.** Repeat types enriched in the middle sections of translocation bins. **(A)** For each upstream (lowest genomic coordinate) IR sequence containing from 0 to 6 C|G bases, the fraction of the total number of IR found in the left, middle and right sections was computed for the translocation and *Contr1* 1-kb bins. The fractions

obtained for the left and right sections were subtracted from those of the middle sections (*Middle – Left* and *Middle – Right*) for translocations (dark green, *Trans*) and Contr1 (cyan, *Contr*). Negative values indicate overrepresentation of IR sequences in left/right sections, whereas positive values indicate overrepresentation of IR sequences in middle sections. **(B)** For DR, the fractions of mono-, di-, tri-, tetra-, penta-, hexa-, and >hexa-nucleotides were computed separately for the translocation, deletion and Contr1 left, middle and right sections. Data for various sections were subtracted from those of the translocation middle section and plotted. Negative values indicate underrepresentation in the translocation middle section; positive values indicate overrepresentation in the translocation middle section. **(C)** and **(D)** For DR found in either the left, middle or right sections of translocation, deletion and Contr1 1-kb bins, the fraction of tri- (Panel C) and di-nucleotides (Panel D) whose strand sequence composition contained only purines (or pyrimidines, i.e. R•Y tracts) relative to all tri- (Panel C) or di-nucleotides (Panel D) in the respective section was computed and plotted. *Green bars* highlight the overrepresentation of R•Y-containing repeats in the middle section of translocations.

### Supplementary Table 1.

A - Ranked p-values for the number of non-B DNA-forming repeats at translocation, deletion and control breakpoint sites.

| Label                | P-values  | Bonferroni corrected significance | Bonferroni corrected P-values |
|----------------------|-----------|-----------------------------------|-------------------------------|
| i_middle_C2_middle_T | 6.93E-185 | significant                       | 1.3854E-180                   |
| i_middle_C1_middle_T | 1.89E-183 | significant                       | 3.786E-179                    |
| i_left_T_middle_T    | 2.35E-176 | significant                       | 4.706E-172                    |
| i_middle_C2_middle_D | 2.34E-154 | significant                       | 4.68E-150                     |
| i_middle_C1_middle_D | 7.55E-152 | significant                       | 1.5092E-147                   |
| h_middle_C2_middle_T | 2.43E-150 | significant                       | 4.856E-146                    |
| h_middle_C1_middle_T | 7.05E-147 | significant                       | 1.4104E-142                   |
| h_middle_D_middle_T  | 9.60E-142 | significant                       | 1.9208E-137                   |
| h_left_T_middle_T    | 1.60E-139 | significant                       | 3.194E-135                    |
| d_middle_C1_middle_D | 3.91E-120 | significant                       | 7.824E-116                    |
| h_right_T_middle_T   | 1.09E-116 | significant                       | 2.176E-112                    |
| q_middle_C1_middle_T | 8.01E-112 | significant                       | 1.6012E-107                   |
| d_middle_C1_middle_T | 3.06E-111 | significant                       | 6.126E-107                    |
| d_middle_C2_middle_T | 2.09E-104 | significant                       | 4.188E-100                    |
| d_left_T_middle_T    | 3.87E-103 | significant                       | 7.746E-99                     |
| d_middle_C2_middle_D | 1.31E-99  | significant                       | 2.626E-95                     |
| i_right_T_middle_T   | 2.27E-93  | significant                       | 4.532E-89                     |
| d_right_T_middle_T   | 2.27E-85  | significant                       | 4.54E-81                      |
| d_left_C1_left_D     | 2.06E-80  | significant                       | 4.116E-76                     |
| q_middle_D_middle_T  | 2.02E-78  | significant                       | 4.042E-74                     |
| i_right_D_middle_D   | 2.90E-75  | significant                       | 5.804E-71                     |
| i_left_D_middle_D    | 4.45E-71  | significant                       | 8.89E-67                      |

|                      |          |                 |            |
|----------------------|----------|-----------------|------------|
| d_right_D_middle_D   | 1.77E-70 | significant     | 3.534E-66  |
| q_right_C1_right_T   | 1.46E-68 | significant     | 2.926E-64  |
| d_middle_D_middle_T  | 3.32E-62 | significant     | 6.63E-58   |
| q_right_D_right_T    | 5.00E-54 | significant     | 1.0006E-49 |
| d_right_C1_right_T   | 2.77E-49 | significant     | 5.544E-45  |
| q_left_C1_left_T     | 1.66E-46 | significant     | 3.328E-42  |
| q_middle_C2_middle_T | 1.97E-41 | significant     | 3.938E-37  |
| d_left_D_middle_D    | 1.17E-40 | significant     | 2.34E-36   |
| d_right_C2_right_T   | 2.13E-39 | significant     | 4.254E-35  |
| d_right_C1_right_D   | 6.04E-35 | significant     | 1.2076E-30 |
| h_left_D_middle_D    | 1.92E-32 | significant     | 3.83E-28   |
| z_middle_C2_middle_D | 2.03E-32 | significant     | 4.062E-28  |
| i_left_C2_left_D     | 3.13E-32 | significant     | 6.254E-28  |
| q_left_T_middle_T    | 1.57E-31 | significant     | 3.144E-27  |
| q_middle_C1_middle_D | 4.40E-31 | significant     | 8.802E-27  |
| h_right_D_right_T    | 6.63E-31 | significant     | 1.3266E-26 |
| i_right_C2_right_T   | 1.67E-30 | significant     | 3.344E-26  |
| d_left_D_left_T      | 2.57E-29 | significant     | 5.146E-25  |
| d_left_C2_left_D     | 2.83E-29 | significant     | 5.656E-25  |
| z_left_C1_left_T     | 6.02E-29 | significant     | 1.2042E-24 |
| i_right_C2_right_D   | 1.48E-28 | significant     | 2.96E-24   |
| z_right_C2_middle_C2 | 3.23E-28 | significant     | 6.458E-24  |
| h_right_C1_right_T   | 1.92E-27 | significant     | 3.842E-23  |
| h_left_D_left_T      | 6.76E-27 | significant     | 1.351E-22  |
| q_left_C2_left_D     | 5.38E-26 | significant     | 1.076E-21  |
| h_left_C1_left_T     | 3.14E-25 | significant     | 6.288E-21  |
| q_middle_C2_middle_D | 1.94E-24 | significant     | 3.888E-20  |
| q_right_D_middle_D   | 1.47E-23 | significant     | 2.944E-19  |
| z_left_C1_middle_C   | 1.68E-23 | significant     | 3.364E-19  |
| i_left_C1_left_D     | 4.15E-23 | significant     | 8.304E-19  |
| h_right_D_middle_D   | 5.24E-23 | significant     | 1.0478E-18 |
| i_middle_D_middle_T  | 5.39E-23 | significant     | 1.078E-18  |
| h_left_C2_left_D     | 3.22E-22 | significant     | 6.438E-18  |
| d_left_T_right_T     | 4.08E-22 | significant     | 8.154E-18  |
| d_right_C2_right_D   | 5.13E-22 | significant     | 1.0266E-17 |
| z_left_C1_left_D     | 1.19E-20 | significant     | 2.378E-16  |
| h_right_C2_right_T   | 1.48E-19 | significant     | 2.964E-15  |
| i_left_D_left_T      | 4.65E-19 | significant     | 9.306E-15  |
| i_left_T_right_T     | 5.34E-19 | significant     | 1.067E-14  |
| q_left_D_left_T      | 6.25E-18 | significant     | 1.2504E-13 |
| z_middle_C2_middle_T | 7.85E-18 | significant     | 1.5704E-13 |
| q_right_C2_right_T   | 4.83E-17 | significant     | 9.658E-13  |
| d_left_C2_right_C2   | 1.17E-16 | significant     | 2.342E-12  |
| z_left_D_middle_D    | 3.12E-16 | significant     | 6.242E-12  |
| q_right_C2_right_D   | 1.57E-15 | significant     | 3.144E-11  |
| z_right_T_middle_T   | 1.80E-15 | significant     | 3.606E-11  |
| d_left_D_right_D     | 3.83E-15 | significant     | 7.666E-11  |
| h_middle_C1_middle_D | 4.88E-15 | significant     | 9.754E-11  |
| z_right_C2_right_T   | 5.86E-15 | significant     | 1.1724E-10 |
| q_left_C1_left_D     | 1.91E-14 | significant     | 3.814E-10  |
| h_left_C1_middle_C   | 2.60E-14 | significant     | 5.198E-10  |
| d_left_C1_left_T     | 1.64E-13 | significant     | 3.282E-09  |
| i_right_C1_right_T   | 1.27E-12 | significant     | 2.53E-08   |
| d_right_D_right_T    | 2.76E-12 | significant     | 5.52E-08   |
| z_left_C1_right_C    | 9.93E-12 | significant     | 1.985E-07  |
| q_left_D_middle_D    | 1.08E-11 | significant     | 2.158E-07  |
| z_left_C2_right_C2   | 4.51E-11 | significant     | 9.028E-07  |
| q_right_T_middle_T   | 7.14E-11 | significant     | 1.4282E-06 |
| z_left_T_right_T     | 1.54E-10 | significant     | 0.00003086 |
| z_right_D_right_T    | 2.06E-10 | significant     | 0.00004128 |
| z_middle_C1_middle_T | 5.54E-10 | significant     | 0.00011086 |
| i_right_C1_right_D   | 1.00E-09 | significant     | 0.00002    |
| i_right_C2_middle_C2 | 3.82E-09 | significant     | 0.00007648 |
| h_middle_C2_middle_D | 6.82E-09 | significant     | 0.0001364  |
| i_left_C2_middle_C2  | 7.30E-09 | significant     | 0.00014604 |
| d_left_C2_middle_C2  | 1.30E-08 | significant     | 0.0002594  |
| z_left_T_middle_T    | 6.06E-08 | significant     | 0.0012126  |
| q_left_C1_middle_C   | 7.50E-08 | significant     | 0.0015006  |
| q_left_T_right_T     | 1.21E-07 | significant     | 0.002418   |
| z_left_D_right_D     | 1.11E-06 | not significant | 0.02228    |
| z_left_C2_left_T     | 1.57E-06 | not significant | 0.03144    |
| z_middle_D_middle_T  | 1.58E-06 | not significant | 0.03164    |
| q_right_C2_middle_C2 | 1.69E-06 | not significant | 0.03388    |

|                      |          |                 |         |
|----------------------|----------|-----------------|---------|
| z_left_D_left_T      | 3.36E-06 | not significant | 0.06718 |
| z_middle_C1_middle_D | 3.67E-06 | not significant | 0.07346 |
| z_right_D_middle_D   | 3.82E-06 | not significant | 0.07632 |
| z_left_C2_middle_C2  | 5.27E-06 | not significant | 0.10538 |
| z_right_C1_right_D   | 5.68E-06 | not significant | 0.11366 |
| h_right_C1_middle_C  | 1.43E-05 | not significant | 0.2852  |
| h_left_C2_right_C2   | 1.83E-05 | not significant | 0.3652  |
| q_left_C2_right_C2   | 2.81E-05 | not significant | 0.5612  |
| q_right_C1_right_D   | 4.29E-05 | not significant | 0.8586  |
| h_left_T_right_T     | 1.11E-04 | not significant | 1       |
| i_left_C1_middle_C   | 5.54E-04 | not significant | 1       |
| q_right_C1_middle_C  | 7.88E-04 | not significant | 1       |
| z_right_C1_middle_C  | 3.50E-03 | not significant | 1       |
| i_left_C1_right_C    | 5.44E-03 | not significant | 1       |
| z_right_C1_right_T   | 1.32E-02 | not significant | 1       |
| q_left_D_right_D     | 3.63E-02 | not significant | 1       |
| q_left_C1_right_C    | 6.12E-02 | not significant | 1       |
| h_left_C1_right_C    | 6.40E-02 | not significant | 1       |
| h_left_D_right_D     | 7.45E-02 | not significant | 1       |
| i_right_D_right_T    | 9.26E-02 | not significant | 1       |
| h_left_C1_left_D     | 3.13E-01 | not significant | 1       |
| h_right_C1_right_D   | 3.70E-01 | not significant | 1       |
| i_left_C1_left_T     | 3.97E-01 | not significant | 1       |
| i_left_D_right_D     | 4.41E-01 | not significant | 1       |
| d_left_C1_middle_C   | 5.49E-01 | not significant | 1       |
| i_right_C1_middle_C  | 6.59E-01 | not significant | 1       |
| d_left_C1_right_C    | 7.34E-01 | not significant | 1       |
| d_right_C1_middle_C  | 8.06E-01 | not significant | 1       |
| h_right_C2_right_D   | 1.75E-04 | not significant | 1       |
| d_right_C2_middle_C2 | 7.31E-04 | not significant | 1       |
| h_left_C2_middle_C2  | 9.12E-04 | not significant | 1       |
| i_left_C2_left_T     | 1.05E-03 | not significant | 1       |
| z_right_C2_right_D   | 1.34E-03 | not significant | 1       |
| d_left_C2_left_T     | 3.16E-02 | not significant | 1       |
| h_left_C2_left_T     | 3.24E-02 | not significant | 1       |
| h_right_C2_middle_C2 | 7.60E-02 | not significant | 1       |
| z_left_C2_left_D     | 3.32E-01 | not significant | 1       |
| q_left_C2_left_T     | 4.09E-01 | not significant | 1       |
| i_left_C2_right_C2   | 7.26E-01 | not significant | 1       |
| q_left_C2_middle_C2  | 9.80E-01 | not significant | 1       |

d, DR; h, H-DNA; i, IR; q, G4-DNA; z, Z-DNA; C1, Contrl; C2, Contr2; D, deletions; T, Translocations

B - Ranked p-values for the number for GC contents at translocation, deletion, and control breakpoint sites.

Critical value: 0.05 Number of tests: 20000  
Corrected critical value: 0.0000025

| Label           | P-values    | Bonferroni corrected significance | Bonferroni corrected P-values |
|-----------------|-------------|-----------------------------------|-------------------------------|
| gc_T_right_t_c  | 5.1743E-143 | significant                       | 1.0349E-138                   |
| gc_I_middle_t_c | 4.0299E-137 | significant                       | 8.0597E-133                   |
| gc_T_left_t_c   | 1.3076E-134 | significant                       | 2.6152E-130                   |
| gc_D_middle_t_c | 2.131E-103  | significant                       | 4.2621E-99                    |
| gc_T_middle_t_c | 1.01675E-93 | significant                       | 2.03351E-89                   |
| gc_H_middle_t_d | 4.98331E-82 | significant                       | 9.96662E-78                   |
| gc_I_middle_d_c | 1.33301E-79 | significant                       | 2.66603E-75                   |
| gc_I_middle_t_d | 4.0778E-57  | significant                       | 8.15561E-53                   |
| gc_D_left_d_c   | 2.6158E-47  | significant                       | 5.2316E-43                    |
| gc_D_middle_t_d | 3.52376E-42 | significant                       | 7.04752E-38                   |
| gc_D_left_t_d   | 2.33256E-39 | significant                       | 4.66512E-35                   |
| gc_H_middle_d_c | 1.7776E-32  | significant                       | 3.5552E-28                    |
| gc_I_left_t_d   | 3.85601E-28 | significant                       | 7.71202E-24                   |
| gc_I_right_d_c  | 2.63271E-20 | significant                       | 5.26542E-16                   |
| gc_H_middle_t_c | 4.09102E-19 | significant                       | 8.18205E-15                   |
| gc_I_left_d_c   | 3.81487E-16 | significant                       | 7.62974E-12                   |

|                 |             |                 |             |
|-----------------|-------------|-----------------|-------------|
| gc_D_right_t_d  | 1.54356E-08 | significant     | 0.000308712 |
| gc_H_left_d_c   | 5.35458E-08 | significant     | 0.001070916 |
| gc_I_right_t_c  | 1.40841E-07 | significant     | 0.002816819 |
| gc_D_right_d_c  | 4.18205E-07 | significant     | 0.008364098 |
| gc_H_left_t_c   | 2.00076E-06 | significant     | 0.040015296 |
| gc_H_right_d_c  | 0.000245314 | not significant | 1           |
| gc_H_right_t_d  | 0.000282709 | not significant | 1           |
| gc_I_left_t_c   | 0.000486602 | not significant | 1           |
| gc_I_right_t_d  | 0.006738116 | not significant | 1           |
| gc_D_middle_d_c | 0.174775767 | not significant | 1           |
| gc_H_right_t_c  | 0.649415628 | not significant | 1           |
| gc_D_left_t_c   | 0.672781808 | not significant | 1           |
| gc_D_right_t_c  | 0.758824601 | not significant | 1           |
| gc_H_left_t_d   | 0.851981696 | not significant | 1           |

-----  
T, whole COSMIC dataset; I, IR; D, DR; H, H-DNA; t, translocations; d, deletions; c, controls;  
left, left section; middle, middle section; right, right section

**Supplementary Table 2.** Fractions of H-DNA repeats containing various numbers of C•G base pairs in the stem

| Section   | Number of C•G base-pairs                                          |         |         |         |         |         |         | Total  |
|-----------|-------------------------------------------------------------------|---------|---------|---------|---------|---------|---------|--------|
|           | 0                                                                 | 1       | 2       | 3       | 4       | 5       | 6       |        |
| Left_T    | 0.3462                                                            | 0.2055  | 0.1455  | 0.1153  | 0.0891  | 0.0605  | 0.0258  | 0.9878 |
| Middle_T  | 0.2910                                                            | 0.1908  | 0.1503  | 0.1311  | 0.1010  | 0.0624  | 0.0292  | 0.9558 |
| Right_T   | 0.3385                                                            | 0.1926  | 0.1385  | 0.1267  | 0.0927  | 0.0682  | 0.0269  | 0.9840 |
| Left_D    | 0.3467                                                            | 0.2140  | 0.1375  | 0.1129  | 0.0935  | 0.0591  | 0.0220  | 0.9858 |
| Middle_D  | 0.3717                                                            | 0.2148  | 0.1321  | 0.1085  | 0.0855  | 0.0527  | 0.0197  | 0.9850 |
| Right_D   | 0.3397                                                            | 0.2144  | 0.1419  | 0.1206  | 0.0877  | 0.0592  | 0.0234  | 0.9870 |
| Left_C1   | 0.3228                                                            | 0.2191  | 0.1551  | 0.1156  | 0.0918  | 0.0600  | 0.0223  | 0.9867 |
| Middle_C1 | 0.3301                                                            | 0.2162  | 0.1423  | 0.1188  | 0.0886  | 0.0651  | 0.0275  | 0.9886 |
| Right_C1  | 0.3298                                                            | 0.2151  | 0.1448  | 0.1142  | 0.0924  | 0.0668  | 0.0226  | 0.9857 |
| Target    | P-values (1-sample Student's t-test: Target vs. other 8 sections) |         |         |         |         |         |         |        |
| Middle_T  | 3.3E-05                                                           | 2.4E-04 | 1.2E-02 | 1.4E-04 | 1.3E-05 | 6.3E-01 | 6.9E-04 |        |
| Middle_D  | 3.5E-04                                                           | 1.5E-01 | 5.8E-04 | 2.0E-03 | 3.0E-03 | 1.0E-04 | 9.7E-04 |        |

T, translocations; D, deletions; C1, Contr1
